# Supplementary material for: Low dose of zearalenone elevated colon cancer cell growth through G protein-coupled estrogenic receptor
Source: PubMed Central journal article supplement (PMC8016995; doi:10.1038/s41598-021-86788-w), 2021-04-01

**Supplementary document**

**Low dose of zearalenone elevated colon cancer cell growth through G protein-coupled estrogenic receptor**

**Emily Kwun Kwan Lo<sup>1</sup>, Jetty Chung-Yung Lee<sup>1</sup>, Paul C Turner<sup>2\*</sup> and Hani El-Nezami<sup>1,3\*</sup>**

<sup>1</sup>School of Biological Sciences, the University of Hong Kong, Hong Kong SAR, China;

<sup>2</sup>Maryland Institute for Applied Environmental Health, School of Public Health, University of Maryland, College Park, Maryland, USA

<sup>3</sup>Institute of Public Health and Clinical Nutrition, University of Eastern Finland, Kuopio, Finland

\* Correspondence: [elnezami@hku.hk](mailto:elnezami@hku.hk), [pturner3@umd.edu](mailto:pturner3@umd.edu)

**Figure S1. Cytotoxic effect of ZEA on human CRC cells. (A)** Cultured colon cancer line (SW480, HCT116, HT29) and normal colon cells (CCD841) were treated with 0-100  $\mu\text{M}$  ZEA for 24, 48 and 72 hours. Cell viability was determined by MTT assay,  $n=5$ . **(B)** HCT116 were treated with 0-3  $\mu\text{M}$  ZEA for 24, 48 and 72 h. CRCs were then trypsinized and fixed with trypan blue solution. Cell counting was carried out using LUNA Automated Cell Counter. Results shown are mean  $\pm$  SEM,  $n=3$ . \* $p<0.05$  and \*\* $p<0.01$  compared to control.

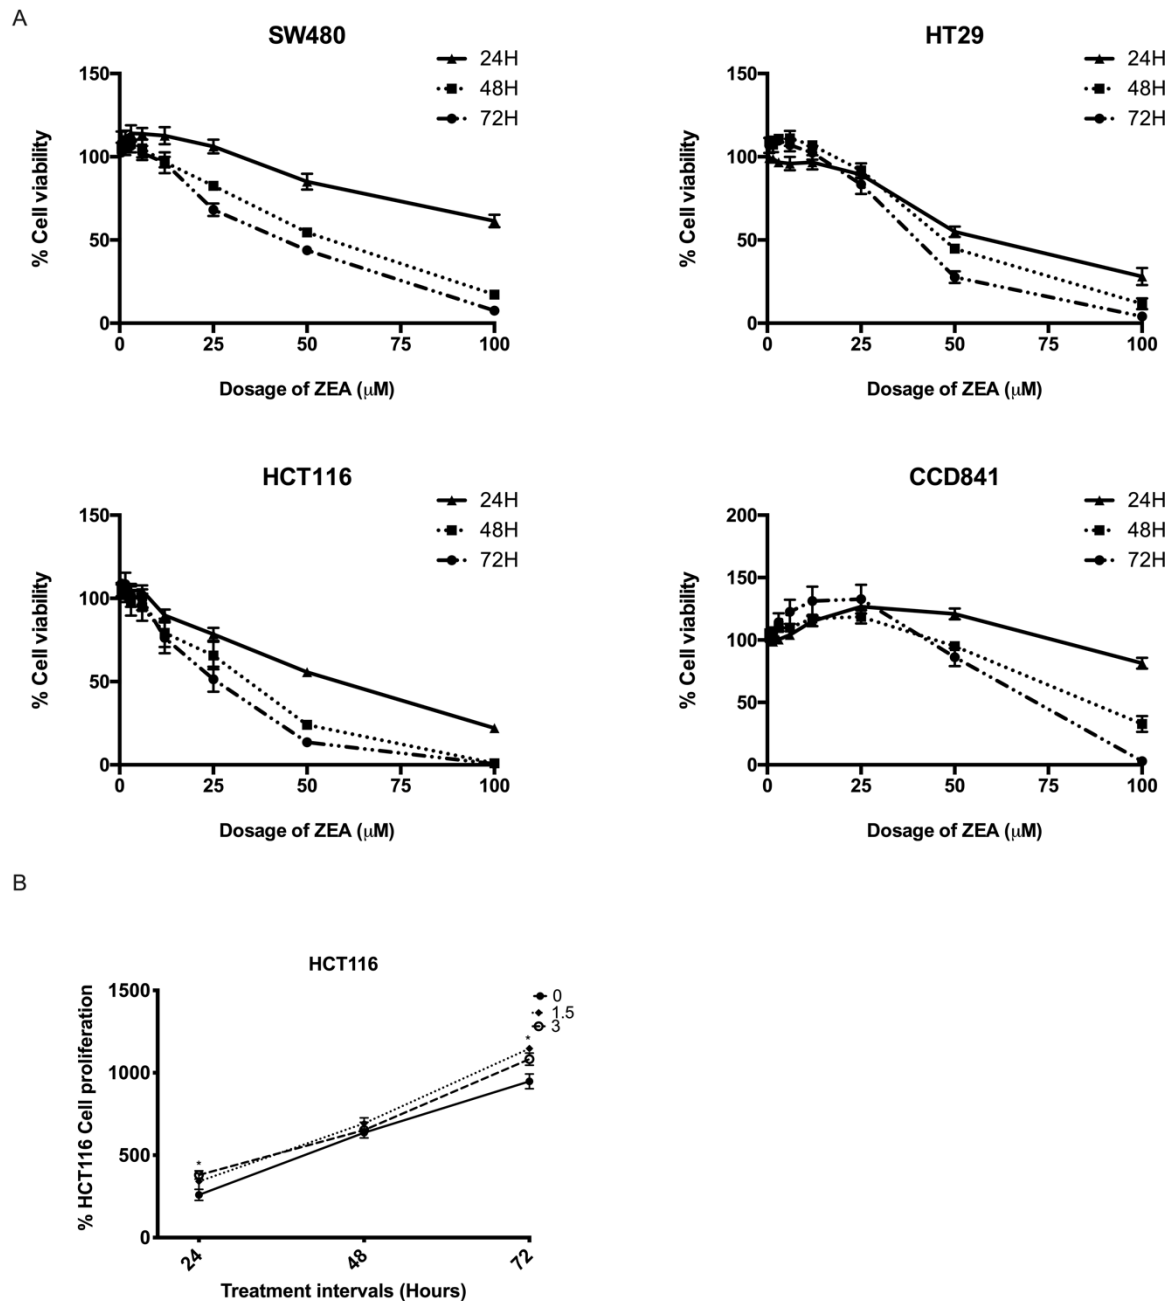

**Figure S2. Cell cycle analysis of SW480 and HT29 with or without 3  $\mu$ M ZEA treatment for 24 hours.** The percentage of S phase, G0/G1 and G2/M are shown in the figures. Results shown are mean  $\pm$  SEM, with n=3. \*p<0.05, \*\*p<0.01 and \*\*\*p<0.001.

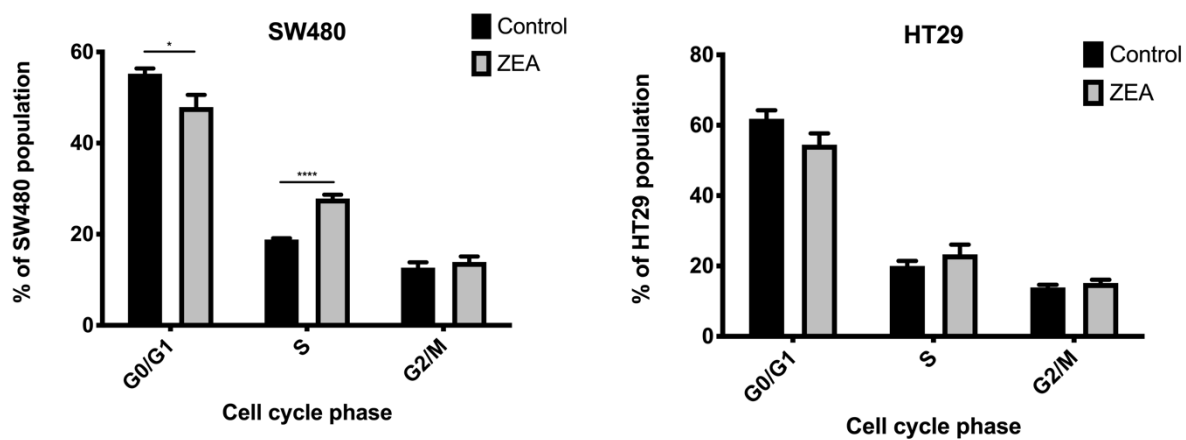

**Figure S3. Effect of ZEA on GPER expression in SW480 and HT29 cell line.** (A) Basal protein expression of GPER in SW480 and HT29 cells were determined by western blotting. (B) Basal protein expression of ER $\alpha$  in SW480 and HT29 cells were determined by western blotting. Protein from MCR-7 cells which known to present ER $\alpha$  represent the positive control. (C) Western blot analysis of GPER protein expression in SW480 and HT29 cells with and without 3  $\mu$ M ZEA was investigated. Results shown are mean  $\pm$  SEM, with n=3. \*p<0.05 and \*\*\*\*p<0.0001.

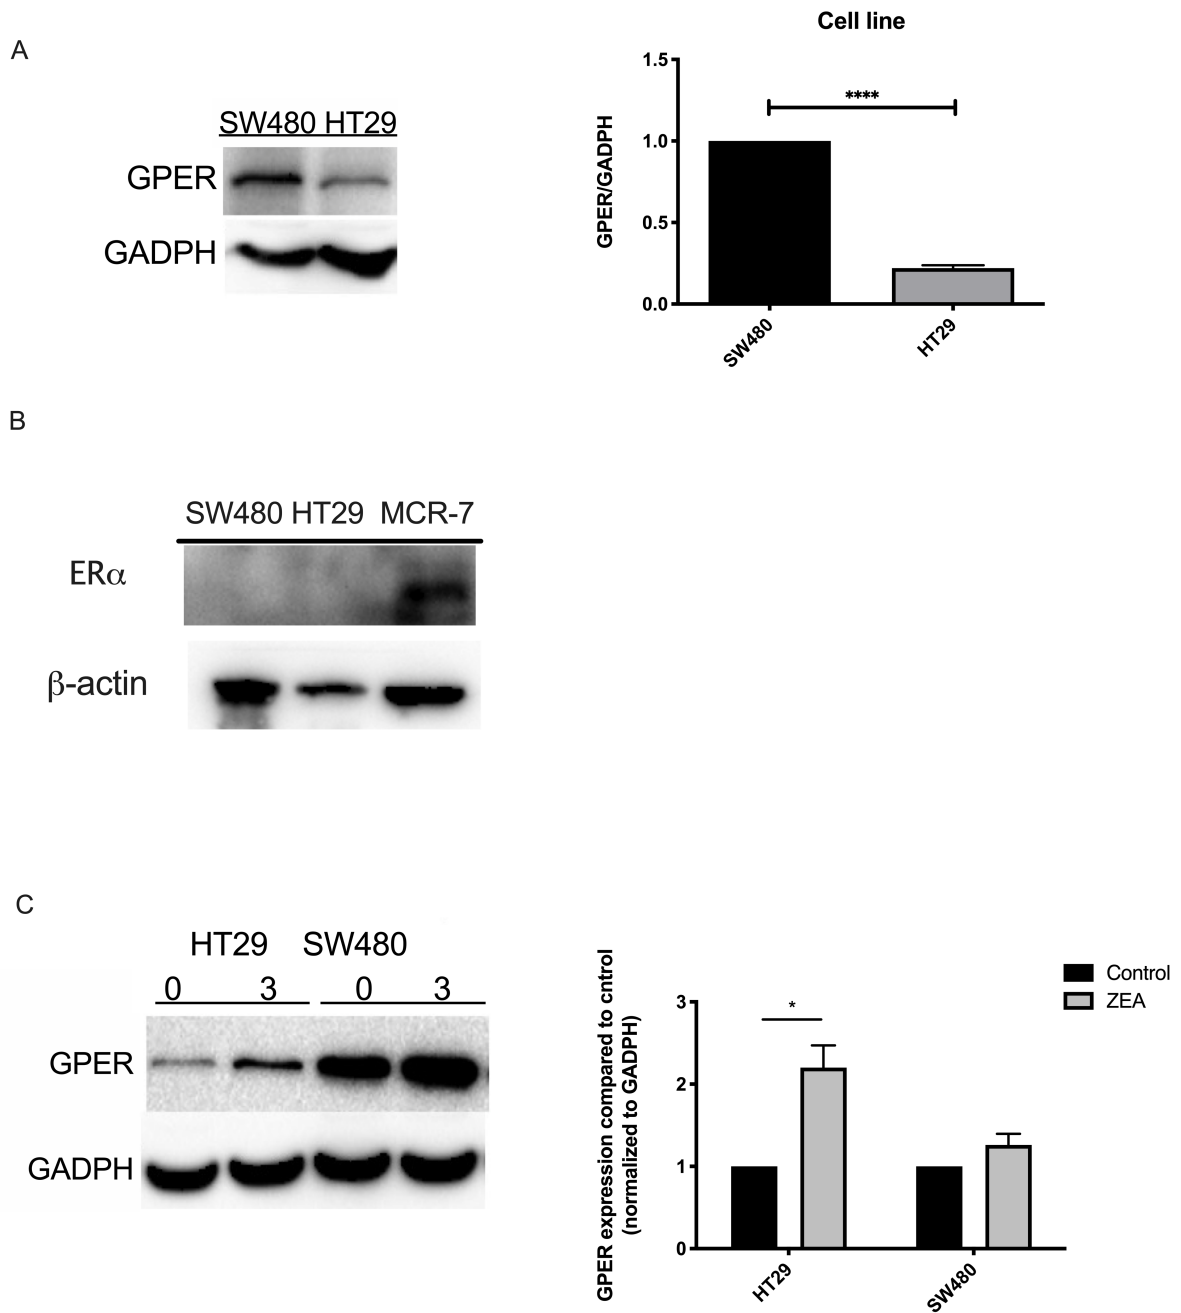



**Figure S4. ZEA promoted YAP gene expression.** RT-qPCR analysis of YAP1, TAZ and downstream marker CYR61 expression in SW480 and HT29 with and without 3  $\mu$ M ZEA treatment for 24 h.

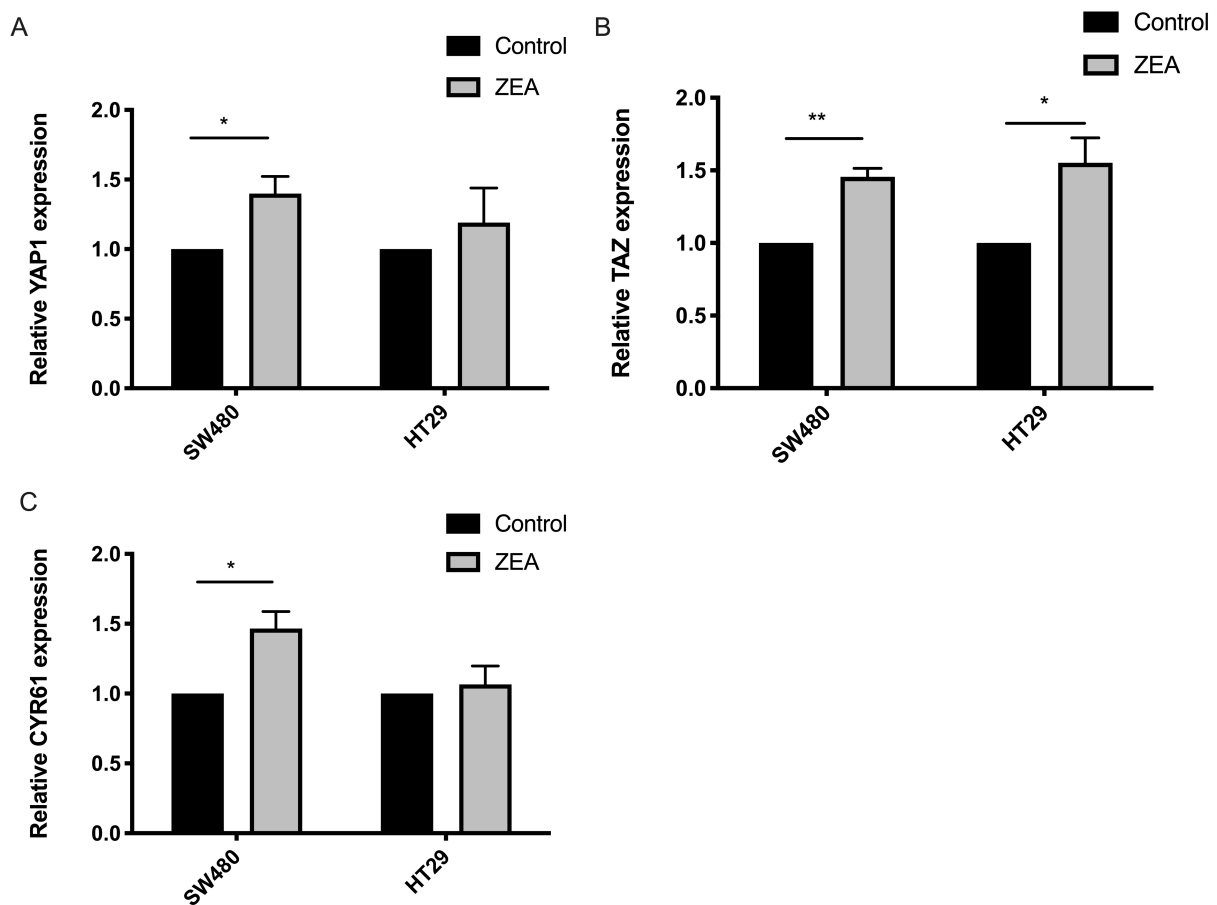

**Figure S5. Cell cycle analysis of SW480 and HT29 co-incubated 3  $\mu$ M ZEA with or without G15 for 24 h.** Representative figure of FITC-BrdU/7-AAD cell cycle analysis.

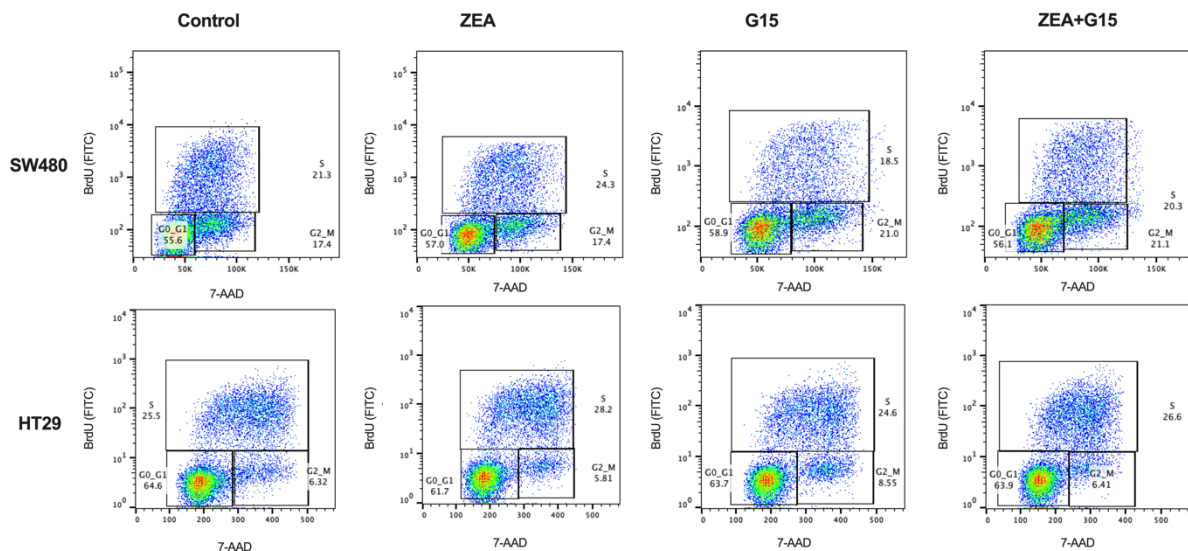

**Table S1. Characteristic of the Cell lines used in the experimentation. [1]**

| <b>Cell line</b> | <b>APC mutation</b>         | <b><math>\beta</math>-Catenin mutation</b> | <b>K-Ras</b> | <b>p53</b>  |
|------------------|-----------------------------|--------------------------------------------|--------------|-------------|
| <b>HT-29</b>     | 1 bp insertion (codon 1555) | Wild type                                  | Wild type    | R273H       |
| <b>SW480</b>     | CAG-TAG (stop) (codon 1338) | Wild type                                  | G12V         | R273H;P309S |

**Table S2. Nucleotide sequences of the primers used for the qPCR analysis**

| <b>Primer set</b> | <b>GenBank</b> | <b>Forward primer sequence (5'-&gt;3')</b> | <b>Reverse primer sequence (3'-&gt;5')</b> |
|-------------------|----------------|--------------------------------------------|--------------------------------------------|
| GAPDH             | NM_001256799.3 | CCAGCAAGAGCACAAAGAGGAAGAG                  | CAAGGGGTCTACATGGCAACTGTG                   |
| ER $\beta$        | NM_001291723.1 | TTCCAGGCAGTAATGGGCG                        | CGCAGGTGTGTGACAAAGTC                       |
| GPER              | NM_001505.3    | TCAACCTCGCCGCCTTCTCCAA                     | CGAGGAGCCAGAAGCCACATC                      |
| CCND1             | NM_053056.3    | TGAGGGACGCTTGTCTGTC                        | GCCTTTGGCCTCTCGATACA                       |
| CDK4              | NM_000075.4    | GTGTATGGGGCCGTAGGAAC                       | CCATAGGCACCGACACCAAT                       |
| CDK6              | NM_001259.7    | GCAGGGAAAGAAAAGTGCAATGA                    | TCCTCGAAGCGAAGTCCTCA                       |
| Ki67              | NM_002417.5    | CGTCCCAGTGGAAGAGTTGT                       | CGACCCCGCTCCTTTTGATA                       |
| YAP1              | NM_001195045.2 | TAGCCCTGCGTAGCCAGTTA                       | TCATGCTTAGTCCACTGTCTGT                     |
| EGFR              | NM_005228.5    | GACAGGCCACCTCGTCG                          | CCGGCTCTCCCGATCAATAC                       |
| TAZ               | NM_000116.5    | GGACCAAGTACATGAACCACC                      | GACTGGTGATTGGACACGGT                       |
| CYR61             | NM_001554.4    | CGCCTTGTGAAAGAAACCCG                       | GGTTCGGGGGATTTCTTGGT                       |
| AREG              | NM_001657.3    | TGTCGCTCTTGATACTCGGC                       | AGGCATTTCACTCACAGGGG                       |
| c-jun             | NM_002228.3    | GAGCTGGAGCGCCTGATAAT                       | CCCTCCTGCTCATCTGTAC                        |
| c-fos             | NM_005252.3    | TACTACCACTACCCGCAGA                        | TGAAGTTGGCACTGGAGACG                       |
| Sirt1             | NM_012238.5    | TGGCAAAGGAGCAGATTAGTAGG                    | CTGCCACAAGAAGACTAGAGGATAAGA                |

**References:**

1. Ahmed, D., et al., *Epigenetic and genetic features of 24 colon cancer cell lines*. *Oncogenesis*, 2013. **2**: p. e71.

**Supplementary information: Full blot images of western blot data**

**Low dose of zearalenone elevated colon cancer cell growth by regulating HIPPO pathway and activating ERK1/2 through G Protein-Coupled Receptor 30**

**Emily Kwun Kwan Lo<sup>1</sup>, Jetty Chung-Yung Lee<sup>1</sup>, Paul C Turner<sup>2\*</sup> and Hani El-Nezami<sup>1,3\*</sup>**

<sup>1</sup>School of Biological Sciences, the University of Hong Kong, Hong Kong SAR, China;

<sup>2</sup>Maryland Institute for Applied Environmental Health, School of Public Health, University of Maryland, College Park, Maryland, USA

<sup>3</sup>Institute of Public Health and Clinical Nutrition, University of Eastern Finland, Kuopio, Finland

\* Correspondence: [elnezami@hku.hk](mailto:elnezami@hku.hk), [pturner3@umd.edu](mailto:pturner3@umd.edu)

**Supplementary Figure S4. Full-length gels from Figures**

Some membranes were used for several samples and were cut, so only the portion containing the described samples and bands would be visualized

**Figure 2B**

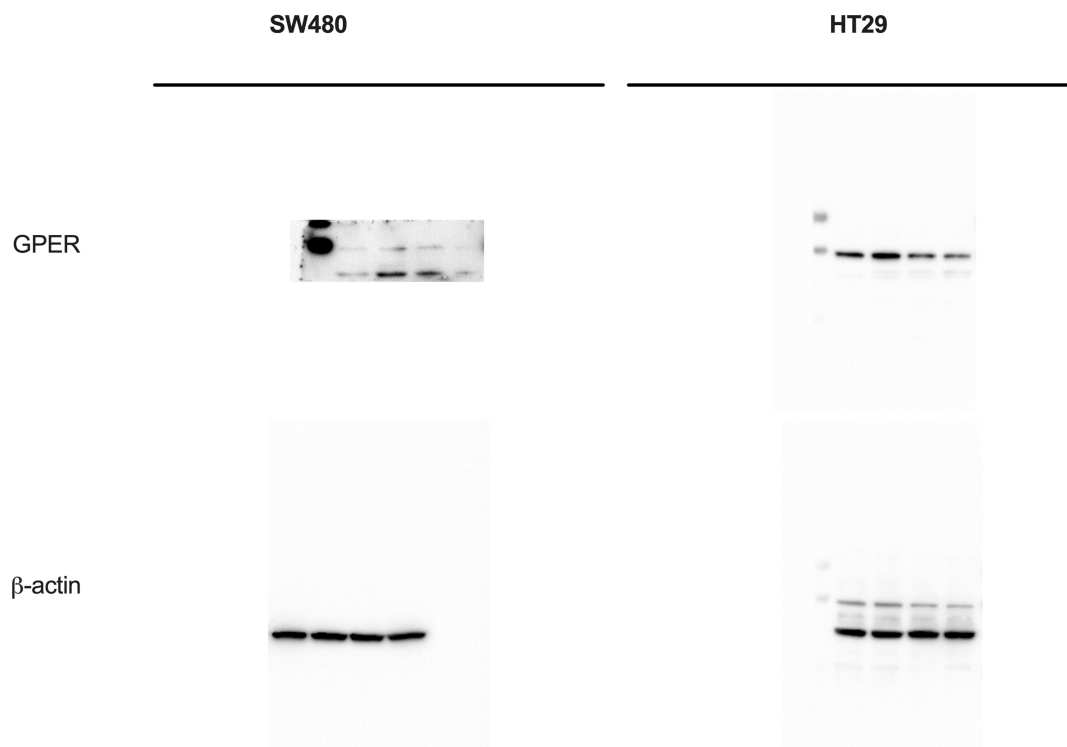

**Figure 4D**

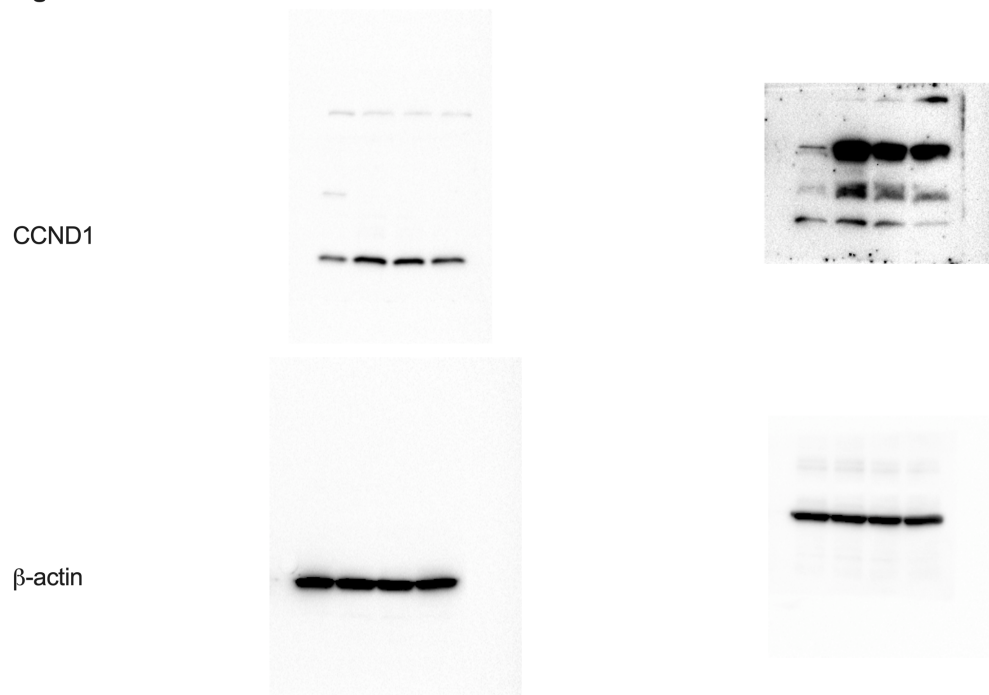

Figure 5A

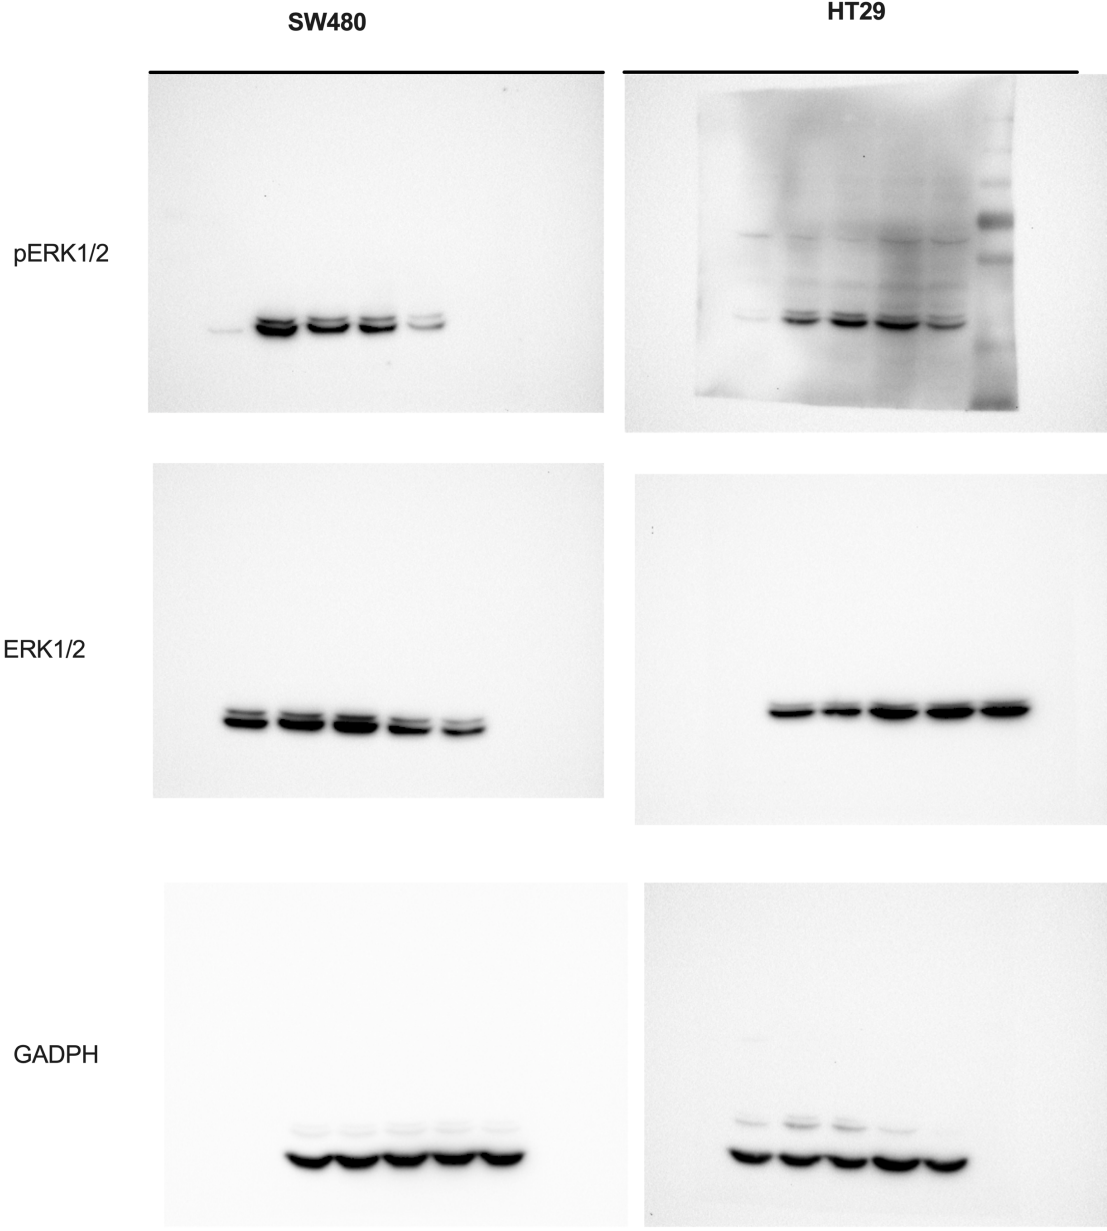

Figure 5B

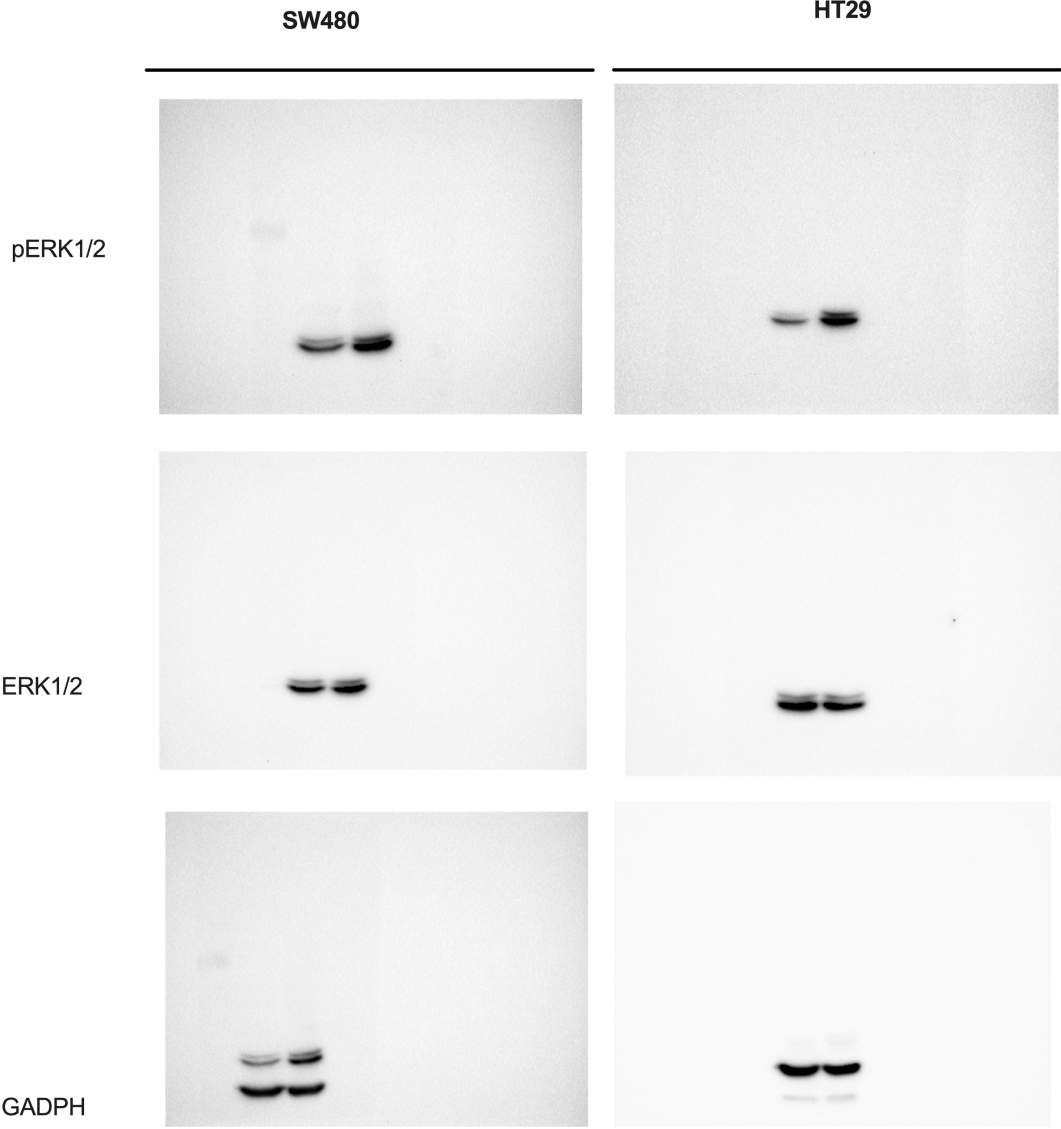

Figure 6A

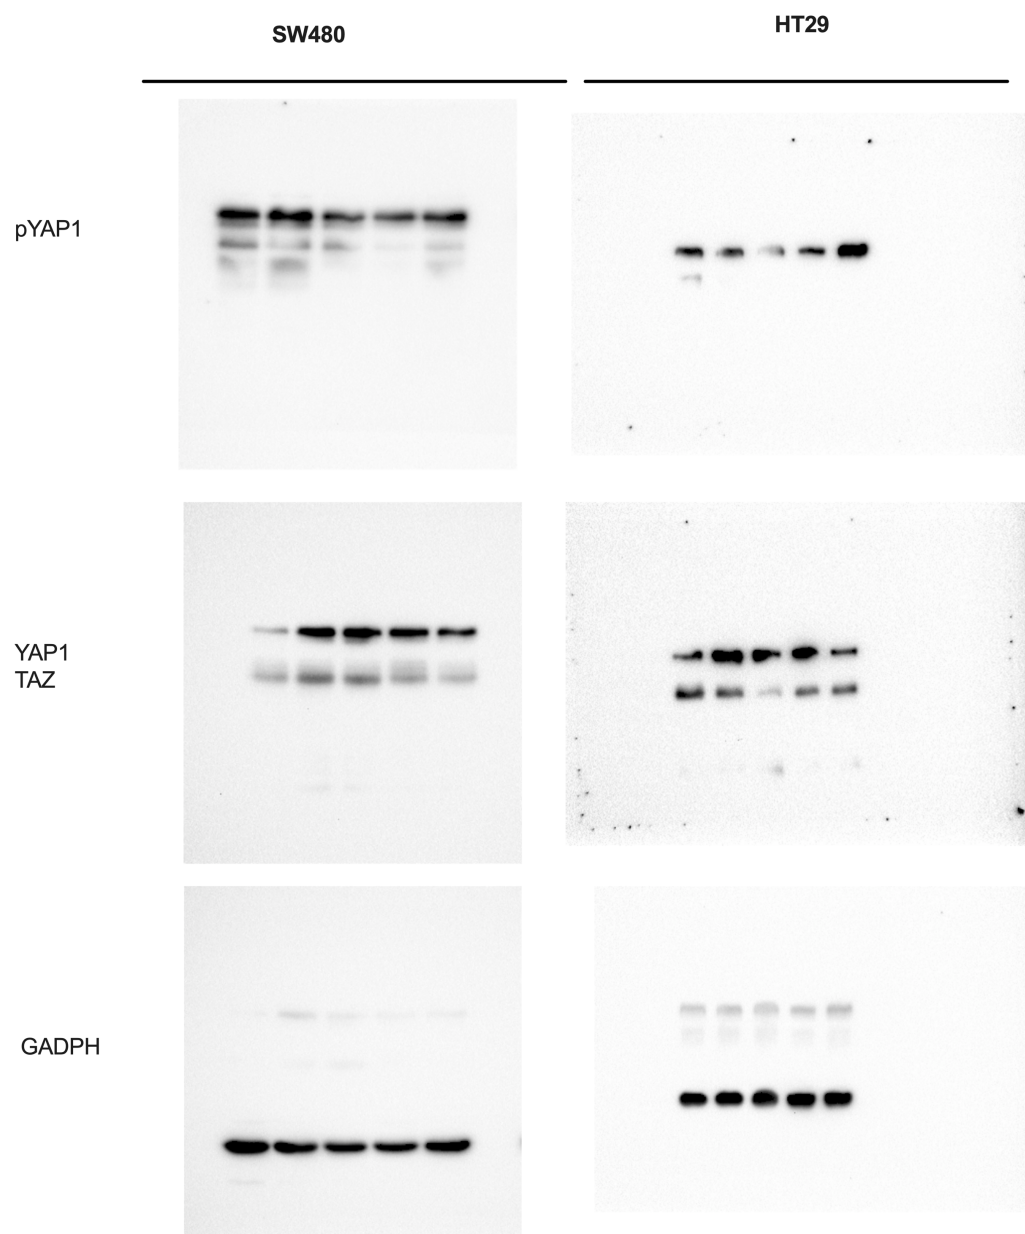



Figure

SW480

HT29

YAP1

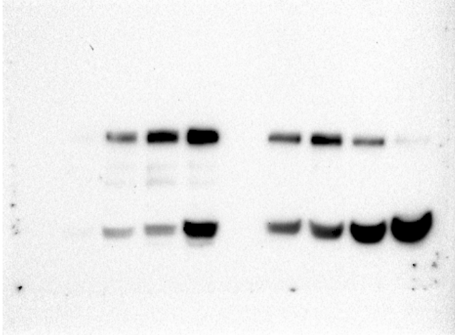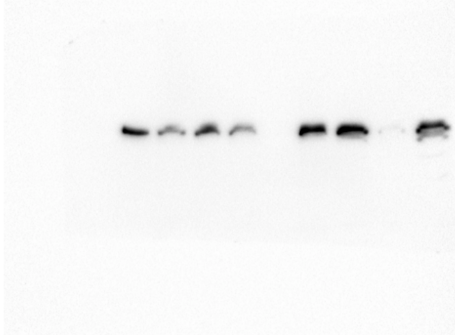

Lamin B1

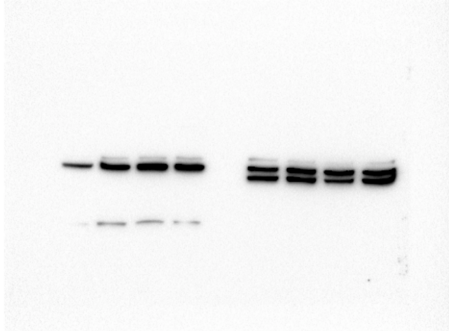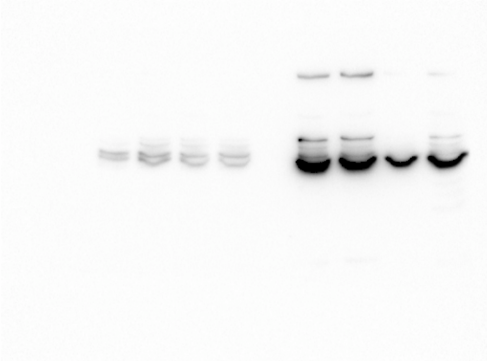

$\alpha$ -tubulin

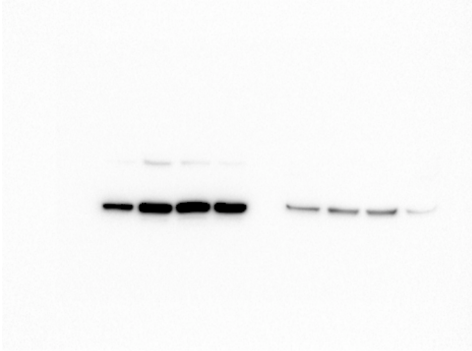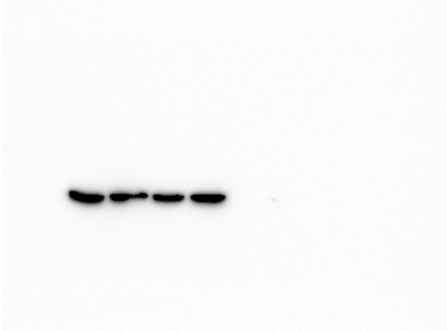

Figure 6B

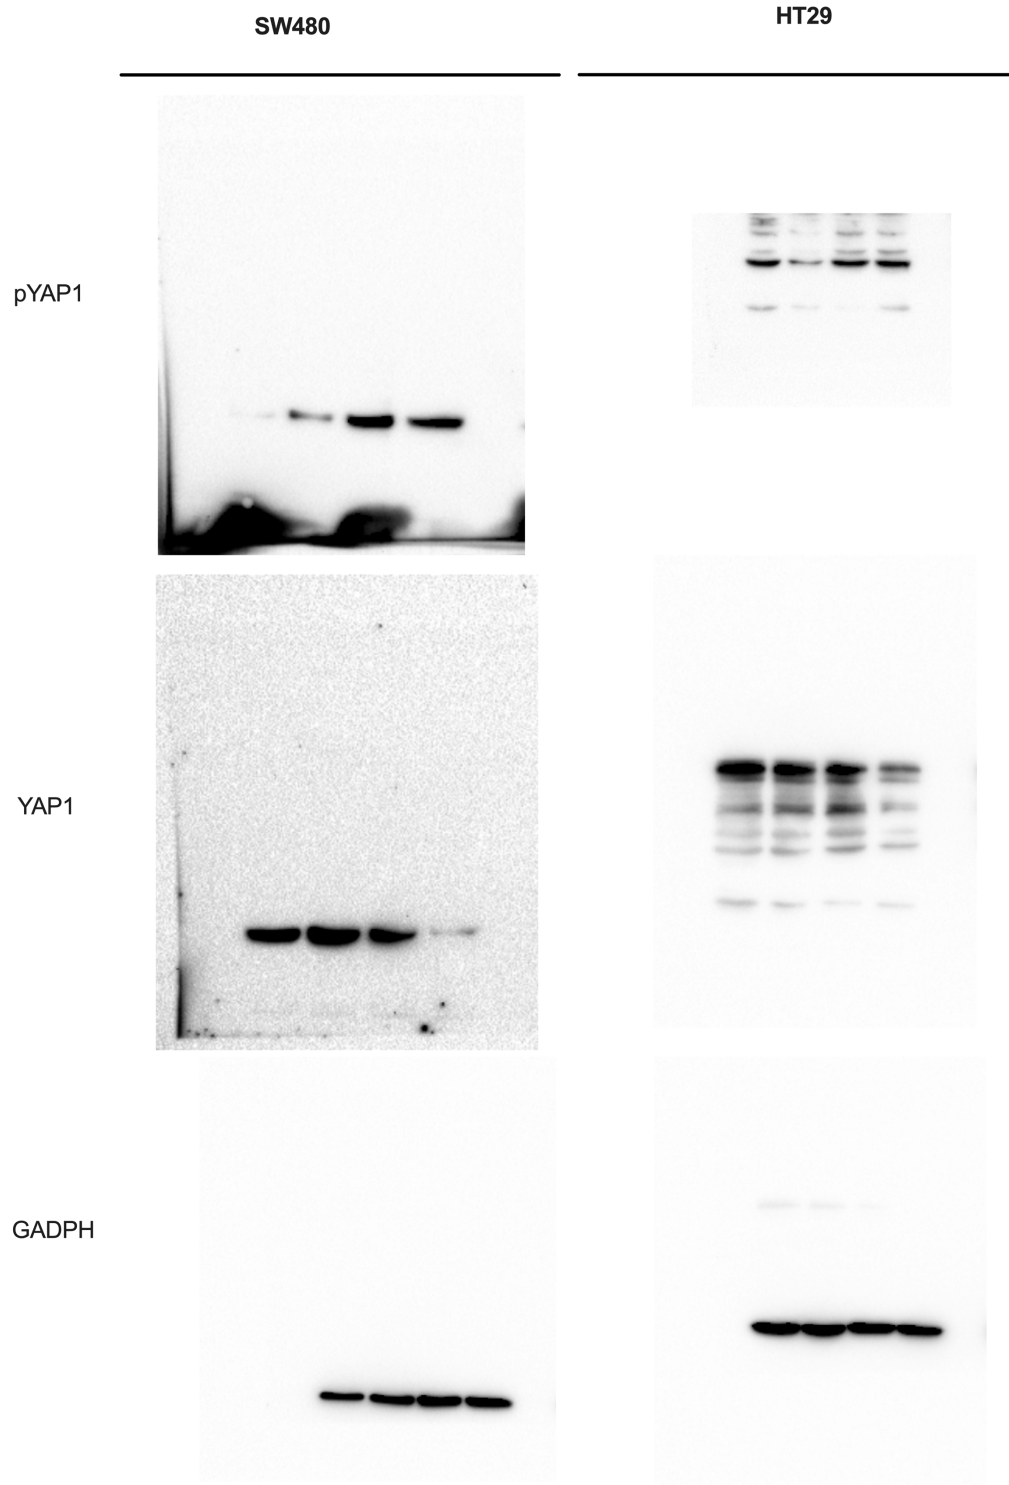

**Figure S3A**

GPER

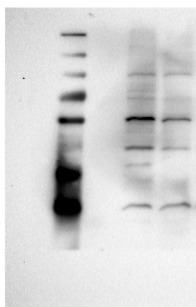

GADPH

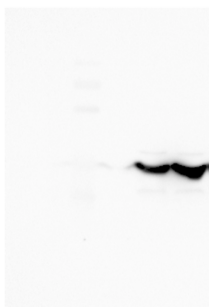

**Figure S3B**

ER $\alpha$

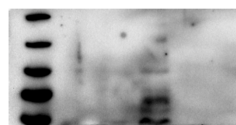

$\beta$ -actin

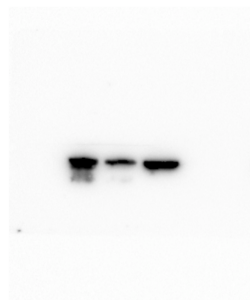

**Figure S3c**

GPER

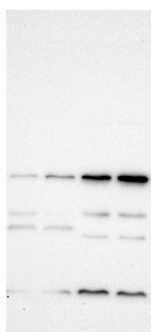

GADPH

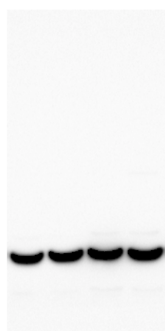

Supplement: 41598_2021_86788_MOESM1_ESM.pdf [file 41598_2021_86788_MOESM1_ESM.pdf]
